# Supplementary material for: Design of an end-effector for robot-assisted ultrasound-guided breast biopsies
Source: Int J Comput Assist Radiol Surg. 2020 Feb 25;15(4):681–90. doi: 10.1007/s11548-020-02122-1 (PMC7142059; doi:10.1007/s11548-020-02122-1)
Supplement: Supplementary file 10 — Supplementary material 10 (GBR 9 kb) [file 11548_2020_2122_MOESM10_ESM.gbr]

G04 #@! TF.GenerationSoftware,KiCad,Pcbnew,(5.0.0)*
G04 #@! TF.CreationDate,2019-12-13T15:35:36+01:00*
G04 #@! TF.ProjectId,Pat9125NeedleSetup,506174393132354E6565646C65536574,rev?*
G04 #@! TF.SameCoordinates,Original*
G04 #@! TF.FileFunction,Copper,L2,Bot,Signal*
G04 #@! TF.FilePolarity,Positive*
%FSLAX46Y46*%
G04 Gerber Fmt 4.6, Leading zero omitted, Abs format (unit mm)*
G04 Created by KiCad (PCBNEW (5.0.0)) date 12/13/19 15:35:36*
%MOMM*%
%LPD*%
G01*
G04 APERTURE LIST*
G04 #@! TA.AperFunction,BGAPad,CuDef*
%ADD10C,0.690000*%
G04 #@! TD*
G04 #@! TA.AperFunction,SMDPad,CuDef*
%ADD11R,0.500000X0.750000*%
G04 #@! TD*
G04 #@! TA.AperFunction,ComponentPad*
%ADD12C,0.600000*%
G04 #@! TD*
G04 #@! TA.AperFunction,ViaPad*
%ADD13C,0.800000*%
G04 #@! TD*
G04 #@! TA.AperFunction,Conductor*
%ADD14C,0.250000*%
G04 #@! TD*
G04 #@! TA.AperFunction,Conductor*
%ADD15C,0.200000*%
G04 #@! TD*
G04 APERTURE END LIST*
D10*
G04 #@! TO.P,U1,9*
G04 #@! TO.N,N/C*
X101150000Y-100000000D03*
D11*
G04 #@! TO.P,U1,8*
G04 #@! TO.N,GND*
X98800000Y-101065000D03*
G04 #@! TO.P,U1,7*
G04 #@! TO.N,N/C*
X99600000Y-101065000D03*
G04 #@! TO.P,U1,6*
G04 #@! TO.N,/SCA*
X100400000Y-101065000D03*
G04 #@! TO.P,U1,5*
G04 #@! TO.N,/SCL*
X101200000Y-101065000D03*
G04 #@! TO.P,U1,4*
G04 #@! TO.N,GND*
X101200000Y-98935000D03*
G04 #@! TO.P,U1,3*
G04 #@! TO.N,/Vdd*
X100400000Y-98935000D03*
G04 #@! TO.P,U1,2*
G04 #@! TO.N,Net-(C1-Pad1)*
X99600000Y-98935000D03*
G04 #@! TO.P,U1,1*
G04 #@! TO.N,/Vdd*
X98800000Y-98935000D03*
G04 #@! TD*
D12*
G04 #@! TO.P,,1*
G04 #@! TO.N,GND*
X95000000Y-102000000D03*
G04 #@! TD*
G04 #@! TO.P,,1*
G04 #@! TO.N,GND*
X105000000Y-99750000D03*
G04 #@! TD*
G04 #@! TO.P,,1*
G04 #@! TO.N,GND*
X96250000Y-100000000D03*
G04 #@! TD*
G04 #@! TO.P,,1*
G04 #@! TO.N,GND*
X95000000Y-97200000D03*
G04 #@! TD*
G04 #@! TO.P,,1*
G04 #@! TO.N,GND*
X97600000Y-97500000D03*
G04 #@! TD*
G04 #@! TO.P,,1*
G04 #@! TO.N,GND*
X102000000Y-95100000D03*
G04 #@! TD*
D13*
G04 #@! TO.N,Net-(C1-Pad1)*
X101000000Y-97500000D03*
G04 #@! TO.N,/SCA*
X97750000Y-100000000D03*
G04 #@! TO.N,/SCL*
X102500000Y-100000000D03*
G04 #@! TO.N,/Vdd*
X99000000Y-97500000D03*
G04 #@! TD*
D14*
G04 #@! TO.N,Net-(C1-Pad1)*
X101000000Y-97500000D02*
X100250000Y-97500000D01*
X100250000Y-97500000D02*
X99600000Y-98150000D01*
X99600000Y-98150000D02*
X99600000Y-98935000D01*
G04 #@! TO.N,/SCA*
X100400000Y-100400000D02*
X100400000Y-101065000D01*
X100250000Y-100250000D02*
X100400000Y-100400000D01*
X98000000Y-100250000D02*
X100250000Y-100250000D01*
X97750000Y-100000000D02*
X98000000Y-100250000D01*
G04 #@! TO.N,/SCL*
X102500000Y-100000000D02*
X101435000Y-101065000D01*
X101435000Y-101065000D02*
X101200000Y-101065000D01*
G04 #@! TO.N,/Vdd*
X98800000Y-98935000D02*
X98800000Y-99349998D01*
X100400000Y-99600000D02*
X100400000Y-98935000D01*
X100250000Y-99750000D02*
X100400000Y-99600000D01*
X99200002Y-99750000D02*
X100250000Y-99750000D01*
X98800000Y-99349998D02*
X99200002Y-99750000D01*
X98800000Y-97700000D02*
X98800000Y-98935000D01*
X99000000Y-97500000D02*
X98800000Y-97700000D01*
G04 #@! TD*
D15*
G04 #@! TO.N,GND*
G36*
X105571000Y-102571000D02*
X94429000Y-102571000D01*
X94429000Y-101371000D01*
X97942000Y-101371000D01*
X97942000Y-101560938D01*
X98034562Y-101784404D01*
X98205595Y-101955437D01*
X98429061Y-102048000D01*
X98523000Y-102048000D01*
X98675000Y-101896000D01*
X98675000Y-101219000D01*
X98094000Y-101219000D01*
X97942000Y-101371000D01*
X94429000Y-101371000D01*
X94429000Y-99850020D01*
X96996000Y-99850020D01*
X96996000Y-100149980D01*
X97110789Y-100427107D01*
X97322893Y-100639211D01*
X97600020Y-100754000D01*
X97899980Y-100754000D01*
X97942000Y-100736595D01*
X97942000Y-100759000D01*
X98094000Y-100911000D01*
X98675000Y-100911000D01*
X98675000Y-100891000D01*
X98925000Y-100891000D01*
X98925000Y-100911000D01*
X98974000Y-100911000D01*
X98974000Y-101219000D01*
X98925000Y-101219000D01*
X98925000Y-101896000D01*
X99077000Y-102048000D01*
X99170939Y-102048000D01*
X99394405Y-101955437D01*
X99548907Y-101800935D01*
X99850000Y-101800935D01*
X99988124Y-101773460D01*
X100000000Y-101765525D01*
X100011876Y-101773460D01*
X100150000Y-101800935D01*
X100650000Y-101800935D01*
X100788124Y-101773460D01*
X100800000Y-101765525D01*
X100811876Y-101773460D01*
X100950000Y-101800935D01*
X101450000Y-101800935D01*
X101588124Y-101773460D01*
X101705220Y-101695220D01*
X101783460Y-101578124D01*
X101810935Y-101440000D01*
X101810935Y-101366472D01*
X102423408Y-100754000D01*
X102649980Y-100754000D01*
X102927107Y-100639211D01*
X103139211Y-100427107D01*
X103254000Y-100149980D01*
X103254000Y-99850020D01*
X103139211Y-99572893D01*
X102927107Y-99360789D01*
X102649980Y-99246000D01*
X102350020Y-99246000D01*
X102072893Y-99360789D01*
X102058000Y-99375682D01*
X102058000Y-99241000D01*
X101906000Y-99089000D01*
X101325000Y-99089000D01*
X101325000Y-99109000D01*
X101075000Y-99109000D01*
X101075000Y-99089000D01*
X101026000Y-99089000D01*
X101026000Y-98781000D01*
X101075000Y-98781000D01*
X101075000Y-98761000D01*
X101325000Y-98761000D01*
X101325000Y-98781000D01*
X101906000Y-98781000D01*
X102058000Y-98629000D01*
X102058000Y-98439062D01*
X101965438Y-98215596D01*
X101794405Y-98044563D01*
X101601613Y-97964705D01*
X101639211Y-97927107D01*
X101754000Y-97649980D01*
X101754000Y-97350020D01*
X101639211Y-97072893D01*
X101427107Y-96860789D01*
X101149980Y-96746000D01*
X100850020Y-96746000D01*
X100572893Y-96860789D01*
X100412682Y-97021000D01*
X100297175Y-97021000D01*
X100250000Y-97011616D01*
X100202825Y-97021000D01*
X100202824Y-97021000D01*
X100063104Y-97048792D01*
X99904660Y-97154660D01*
X99877935Y-97194657D01*
X99744795Y-97327797D01*
X99639211Y-97072893D01*
X99427107Y-96860789D01*
X99149980Y-96746000D01*
X98850020Y-96746000D01*
X98572893Y-96860789D01*
X98360789Y-97072893D01*
X98246000Y-97350020D01*
X98246000Y-97649980D01*
X98321000Y-97831048D01*
X98321000Y-98287260D01*
X98294780Y-98304780D01*
X98216540Y-98421876D01*
X98189065Y-98560000D01*
X98189065Y-99310000D01*
X98204646Y-99388328D01*
X98177107Y-99360789D01*
X97899980Y-99246000D01*
X97600020Y-99246000D01*
X97322893Y-99360789D01*
X97110789Y-99572893D01*
X96996000Y-99850020D01*
X94429000Y-99850020D01*
X94429000Y-94929000D01*
X105571001Y-94929000D01*
X105571000Y-102571000D01*
X105571000Y-102571000D01*
G37*
X105571000Y-102571000D02*
X94429000Y-102571000D01*
X94429000Y-101371000D01*
X97942000Y-101371000D01*
X97942000Y-101560938D01*
X98034562Y-101784404D01*
X98205595Y-101955437D01*
X98429061Y-102048000D01*
X98523000Y-102048000D01*
X98675000Y-101896000D01*
X98675000Y-101219000D01*
X98094000Y-101219000D01*
X97942000Y-101371000D01*
X94429000Y-101371000D01*
X94429000Y-99850020D01*
X96996000Y-99850020D01*
X96996000Y-100149980D01*
X97110789Y-100427107D01*
X97322893Y-100639211D01*
X97600020Y-100754000D01*
X97899980Y-100754000D01*
X97942000Y-100736595D01*
X97942000Y-100759000D01*
X98094000Y-100911000D01*
X98675000Y-100911000D01*
X98675000Y-100891000D01*
X98925000Y-100891000D01*
X98925000Y-100911000D01*
X98974000Y-100911000D01*
X98974000Y-101219000D01*
X98925000Y-101219000D01*
X98925000Y-101896000D01*
X99077000Y-102048000D01*
X99170939Y-102048000D01*
X99394405Y-101955437D01*
X99548907Y-101800935D01*
X99850000Y-101800935D01*
X99988124Y-101773460D01*
X100000000Y-101765525D01*
X100011876Y-101773460D01*
X100150000Y-101800935D01*
X100650000Y-101800935D01*
X100788124Y-101773460D01*
X100800000Y-101765525D01*
X100811876Y-101773460D01*
X100950000Y-101800935D01*
X101450000Y-101800935D01*
X101588124Y-101773460D01*
X101705220Y-101695220D01*
X101783460Y-101578124D01*
X101810935Y-101440000D01*
X101810935Y-101366472D01*
X102423408Y-100754000D01*
X102649980Y-100754000D01*
X102927107Y-100639211D01*
X103139211Y-100427107D01*
X103254000Y-100149980D01*
X103254000Y-99850020D01*
X103139211Y-99572893D01*
X102927107Y-99360789D01*
X102649980Y-99246000D01*
X102350020Y-99246000D01*
X102072893Y-99360789D01*
X102058000Y-99375682D01*
X102058000Y-99241000D01*
X101906000Y-99089000D01*
X101325000Y-99089000D01*
X101325000Y-99109000D01*
X101075000Y-99109000D01*
X101075000Y-99089000D01*
X101026000Y-99089000D01*
X101026000Y-98781000D01*
X101075000Y-98781000D01*
X101075000Y-98761000D01*
X101325000Y-98761000D01*
X101325000Y-98781000D01*
X101906000Y-98781000D01*
X102058000Y-98629000D01*
X102058000Y-98439062D01*
X101965438Y-98215596D01*
X101794405Y-98044563D01*
X101601613Y-97964705D01*
X101639211Y-97927107D01*
X101754000Y-97649980D01*
X101754000Y-97350020D01*
X101639211Y-97072893D01*
X101427107Y-96860789D01*
X101149980Y-96746000D01*
X100850020Y-96746000D01*
X100572893Y-96860789D01*
X100412682Y-97021000D01*
X100297175Y-97021000D01*
X100250000Y-97011616D01*
X100202825Y-97021000D01*
X100202824Y-97021000D01*
X100063104Y-97048792D01*
X99904660Y-97154660D01*
X99877935Y-97194657D01*
X99744795Y-97327797D01*
X99639211Y-97072893D01*
X99427107Y-96860789D01*
X99149980Y-96746000D01*
X98850020Y-96746000D01*
X98572893Y-96860789D01*
X98360789Y-97072893D01*
X98246000Y-97350020D01*
X98246000Y-97649980D01*
X98321000Y-97831048D01*
X98321000Y-98287260D01*
X98294780Y-98304780D01*
X98216540Y-98421876D01*
X98189065Y-98560000D01*
X98189065Y-99310000D01*
X98204646Y-99388328D01*
X98177107Y-99360789D01*
X97899980Y-99246000D01*
X97600020Y-99246000D01*
X97322893Y-99360789D01*
X97110789Y-99572893D01*
X96996000Y-99850020D01*
X94429000Y-99850020D01*
X94429000Y-94929000D01*
X105571001Y-94929000D01*
X105571000Y-102571000D01*
G04 #@! TD*
M02*
