# Supplementary material for: Design of an end-effector for robot-assisted ultrasound-guided breast biopsies
Source: Int J Comput Assist Radiol Surg. 2020 Feb 25;15(4):681–90. doi: 10.1007/s11548-020-02122-1 (PMC7142059; doi:10.1007/s11548-020-02122-1)
Supplement: Supplementary file 11 — Supplementary material 11 (GBR 0 kb) [file 11548_2020_2122_MOESM11_ESM.gbr]

G04 #@! TF.GenerationSoftware,KiCad,Pcbnew,(5.0.0)*
G04 #@! TF.CreationDate,2019-12-13T15:35:36+01:00*
G04 #@! TF.ProjectId,Pat9125NeedleSetup,506174393132354E6565646C65536574,rev?*
G04 #@! TF.SameCoordinates,Original*
G04 #@! TF.FileFunction,Soldermask,Bot*
G04 #@! TF.FilePolarity,Negative*
%FSLAX46Y46*%
G04 Gerber Fmt 4.6, Leading zero omitted, Abs format (unit mm)*
G04 Created by KiCad (PCBNEW (5.0.0)) date 12/13/19 15:35:36*
%MOMM*%
%LPD*%
G01*
G04 APERTURE LIST*
%ADD10C,1.090000*%
%ADD11R,0.900000X1.150000*%
G04 APERTURE END LIST*
D10*
G04 #@! TO.C,U1*
X101150000Y-100000000D03*
D11*
X98800000Y-101065000D03*
X99600000Y-101065000D03*
X100400000Y-101065000D03*
X101200000Y-101065000D03*
X101200000Y-98935000D03*
X100400000Y-98935000D03*
X99600000Y-98935000D03*
X98800000Y-98935000D03*
G04 #@! TD*
M02*
